# Supplementary material for: Results of COVID-19 Surveillance in a Large United States Pediatric Healthcare System over One Year
Source: MDPI journal article supplement (doi:10.3390/children8090752), 2021-08-30
Supplement: s1 [file s1]

**Supplemental table 1.** ICD-10-CM codes for comorbidities.

| <b>Comorbidities</b>         | <b>ICD-10-CM</b>  |
|------------------------------|-------------------|
| Asthma                       | J45               |
| Anemia                       | D60-D64           |
| Anxiety                      | F40- F48          |
| Cardiac malformation         | Q20-Q28           |
| Depressive disorders         | F32; F33          |
| Epilepsy                     | G40               |
| Hypertension                 | I10-I16           |
| Neurodevelopmental disorders | F50-F99           |
| Obesity                      | E65-E68           |
| Substance use disorders      | F10-F19           |
| Type 1 diabetes              | E10               |
| Type 2 diabetes              | E11               |
| Any diabetes                 | E08-E13           |
| Injury/Trauma                | S00-S99; T07; T14 |
