# Supplementary figures and images for: Results of COVID-19 Surveillance in a Large United States Pediatric Healthcare System over One Year
Source: MDPI journal article supplement (doi:10.3390/children8090752), 2021-08-30

**Supplemental figure 1.** Flow chart of study participants.

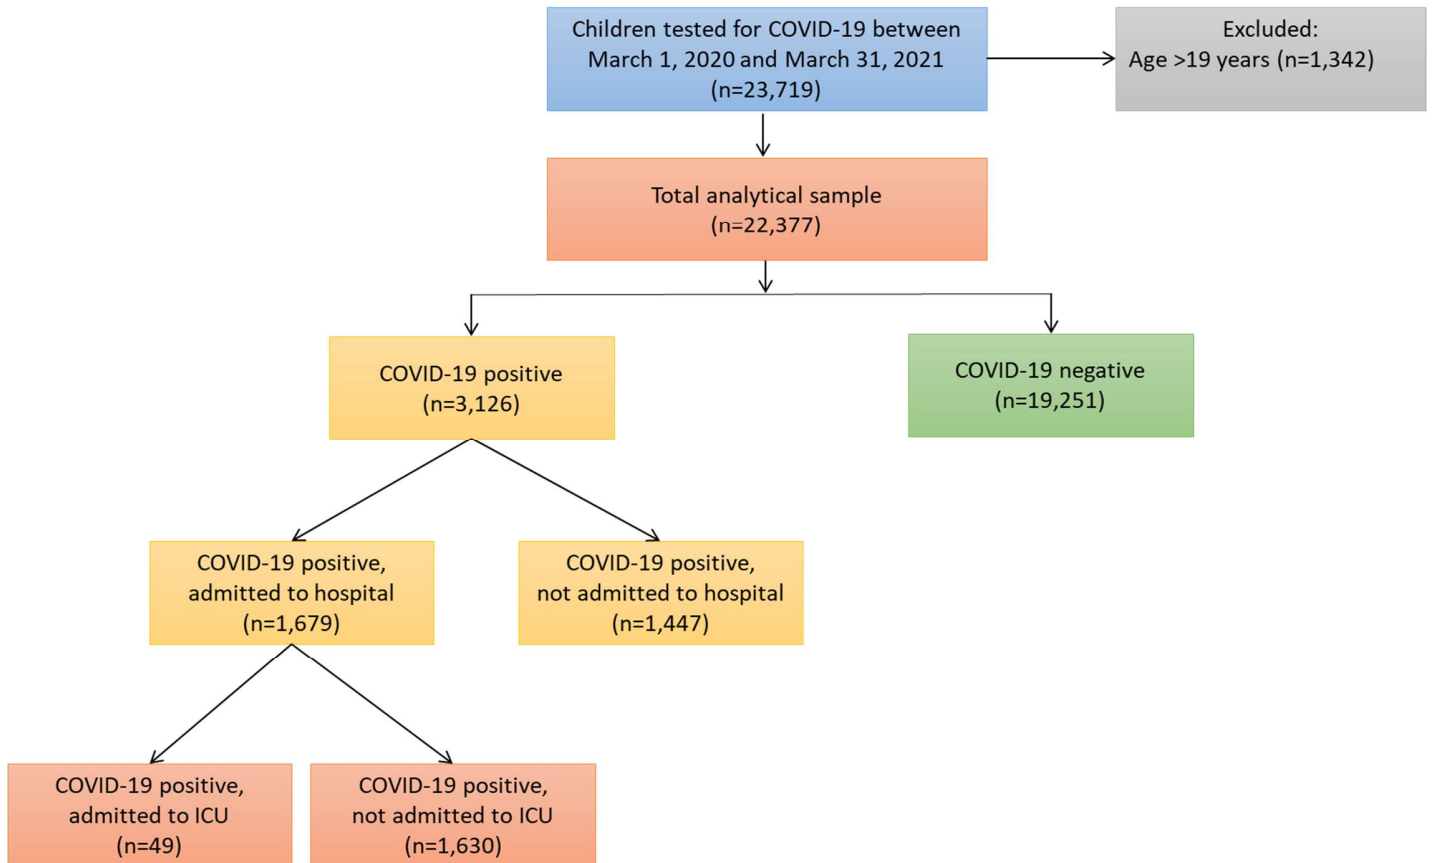

Supplement: s1 [file s1]
